# Supplementary material for: Association between the neutrophil-to-lymphocyte ratio and obstructive sleep apnea: a meta-analysis
Source: PubMed Central journal article supplement (PMC7331605; doi:10.1038/s41598-020-67708-w), 2020-07-02

Supplementary materials for

**Association between the Neutrophil-to-Lymphocyte Ratio and Obstructive Sleep Apnea: A  
Meta-analysis**

Min-Seok Rha, Chang-Hoon Kim, Joo-Heon Yoon, Hyung-Ju Cho

**Supplementary Table 1. Search strategy**

| Source               | Search Terms                                                                                                                                                                                                                                                                                                                                                             |
|----------------------|--------------------------------------------------------------------------------------------------------------------------------------------------------------------------------------------------------------------------------------------------------------------------------------------------------------------------------------------------------------------------|
| Pubmed               | (“sleep apnea syndromes”[MeSH] OR “obstructive sleep apnea”[All Fields] OR “sleep apnea”[All Fields] OR OSA[All Fields] OR “sleep-disordered breathing”[All Fields] OR “sleep disorders”[All Fields]) AND (“neutrophil to lymphocyte ratio”[All Fields] OR “neutrophil lymphocyte ratio”[All Fields] OR “neutrophil-to-lymphocyte ratio”[All Fields] OR NLR[All Fields]) |
| Web of Science       | ALL=((“obstructive sleep apnea” OR “sleep apnea” OR OSA OR “sleep-disordered breathing” OR “sleep disorders”) AND (“neutrophil to lymphocyte ratio” OR “neutrophil lymphocyte ratio” OR “neutrophil-to-lymphocyte ratio” OR NLR))                                                                                                                                        |
| Google Scholar       | (“obstructive sleep apnea” OR “sleep apnea” OR OSA OR “sleep-disordered breathing” OR “sleep disorders”) AND (“neutrophil to lymphocyte ratio” OR “neutrophil lymphocyte ratio” OR “neutrophil-to-lymphocyte ratio” OR NLR)                                                                                                                                              |
| The Cochrane Library | #1: (“obstructive sleep apnea” OR “sleep apnea” OR OSA OR “sleep-disordered breathing” OR “sleep disorders”)<br>#2: MeSH descriptor: [sleep apnea syndromes] explode all trees<br>#3: (“neutrophil to lymphocyte ratio” OR “neutrophil lymphocyte ratio” OR “neutrophil-to-lymphocyte ratio” OR NLR)<br>#4: #1 or #2<br>#5: #3 and #4                                    |

## **Supplementary Figures Legends**

### **Supplementary Figure 1. Meta-regression analysis.**

Bubble plots of the associations between SMD of NLR and each parameter. (a) difference in mean age (years), (b) difference in mean BMI, (c) difference in proportion of male patients (%). Solid line represents inverse variance-weighted meta-regression trend line. BMI, body mass index; SMD, standardized mean difference.

### **Supplementary Figure 2. The funnel plot for exploring the publication bias.**

SMD, standardized mean difference.

### **Supplementary Figure 3. Sensitivity analysis of the meta-analysis.**

A forest plot for the sensitivity analysis is presented. Calculation was based on the random effects model. The results were expressed as the standardized mean difference and 95% confidence intervals. SMD, standardized mean difference; CI, confidence interval.

### **Supplementary Figure 4. Comparison of the neutrophil-to-lymphocyte ratio before and after treatment with CPAP.**

Calculation was based on the fixed effect model. The results were expressed as the standardized mean difference and 95% confidence intervals. CPAP, continuous positive airway pressure; SD, standard deviation; SMD, standardized mean difference; CI, confidence interval.

# Supplementary Figure 1

(a)

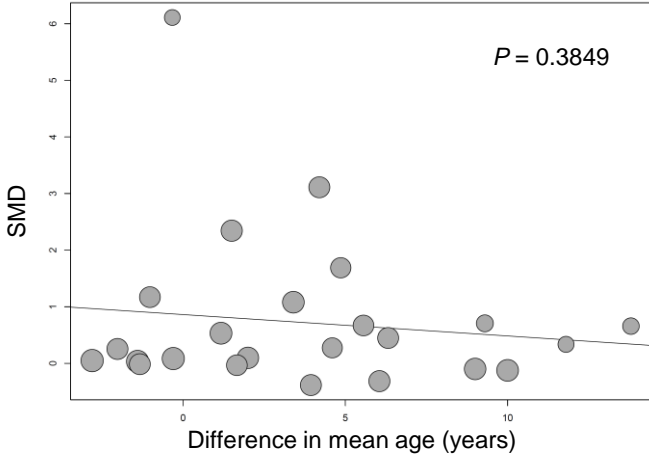

(b)

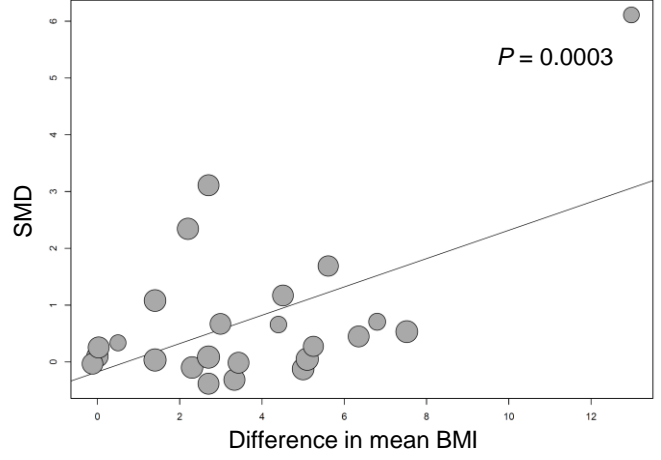

(c)

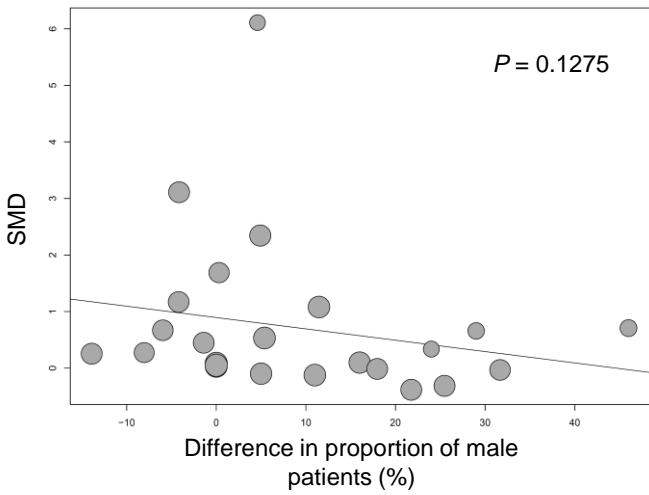

## Supplementary Figure 2

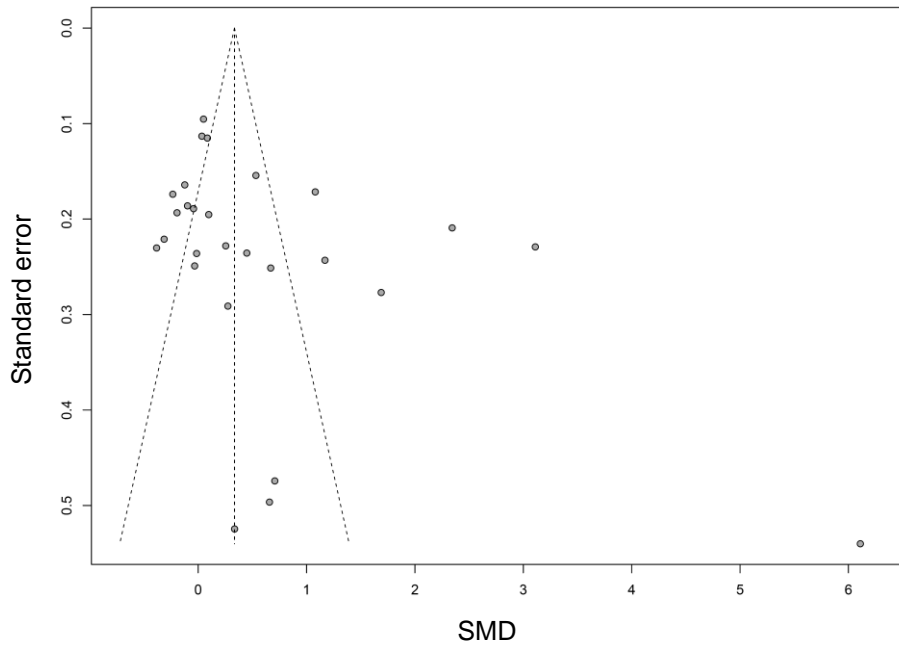

# Supplementary Figure 3

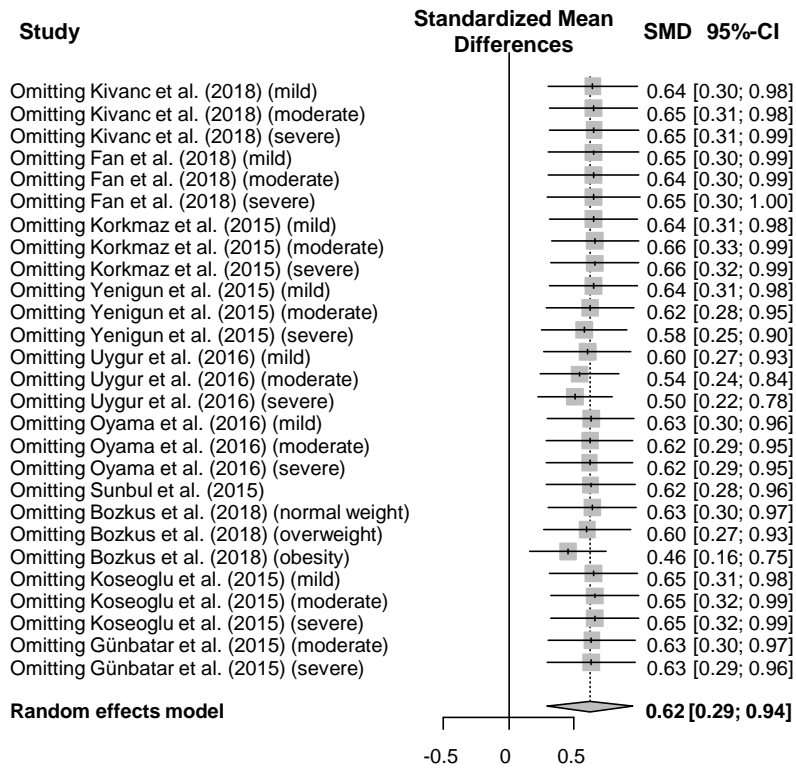

## Supplementary Figure 4

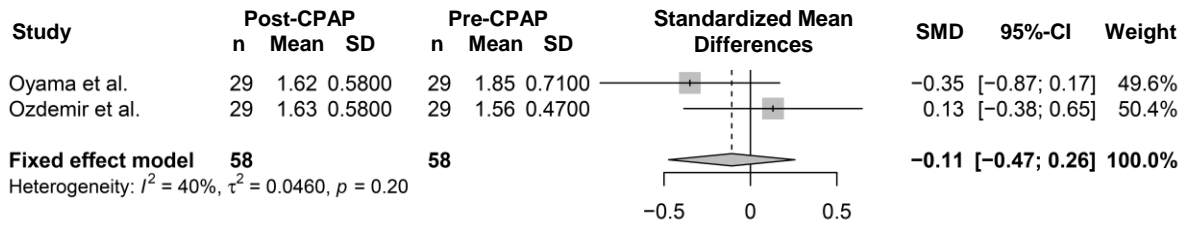

Supplement: 41598_2020_67708_MOESM1_ESM.pdf [file 41598_2020_67708_MOESM1_ESM.pdf]
